# Supplementary material
Source: publisher figshare collection journal article supplement (https://acs.figshare.com/ndownloader/files/18006125)
Supplement: Supplementary file 1 [file 18006125]

# Evaluating the performance of Ni catalyst supported on $\text{La}_2\text{O}_3\text{-MgAl}_2\text{O}_4$ for dry reforming of methane in a packed bed dielectric barrier discharge (DBD) plasma reactor

*Asif Hussain Khoja<sup>†,‡</sup>, Muhammad Tahir<sup>†</sup>, Nor Aishah Saidina Amin<sup>†\*</sup>*

*<sup>†</sup>Chemical Reaction Engineering Group (CREG), School of Chemical & Energy Engineering, Faculty of Engineering, Universiti Teknologi Malaysia (UTM), 81310 Skudai, Johor Bahru, Malaysia*

*<sup>‡</sup>Fossil Fuels Laboratory, Department of Thermal Energy Engineering, US-Pakistan Centre for Advanced Studies in Energy (USPCAS-E), National University of Sciences & Technology (NUST), Sector H-12 Islamabad (44000), Pakistan*

\*Corresponding Author's Email: [noraishah@cheme.utm.my](mailto:noraishah@cheme.utm.my)

## Supplementary information

**Article No:** AF-2019-022364

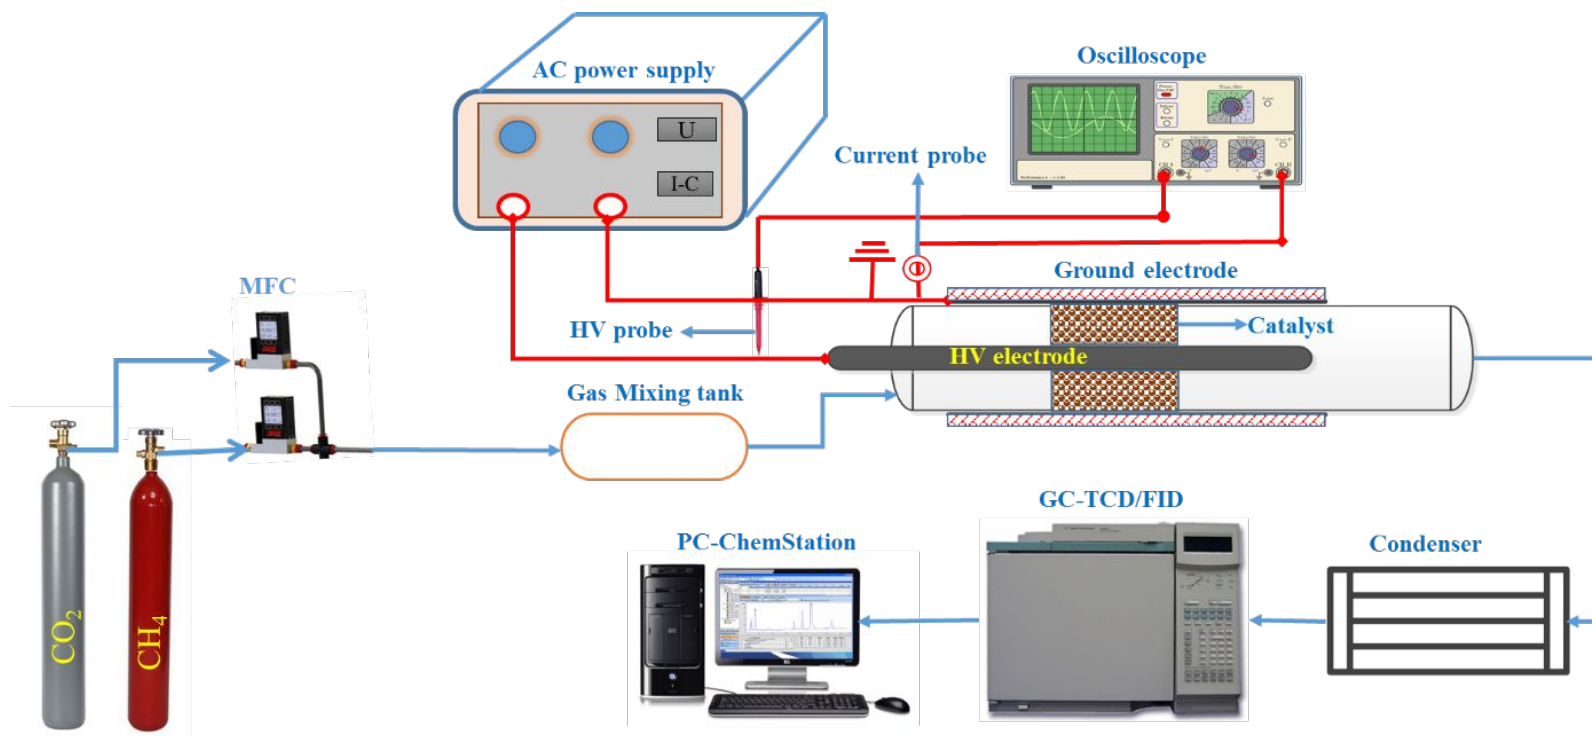

**Figure S1:** Schematic diagram of catalytic DBD plasma reactor.

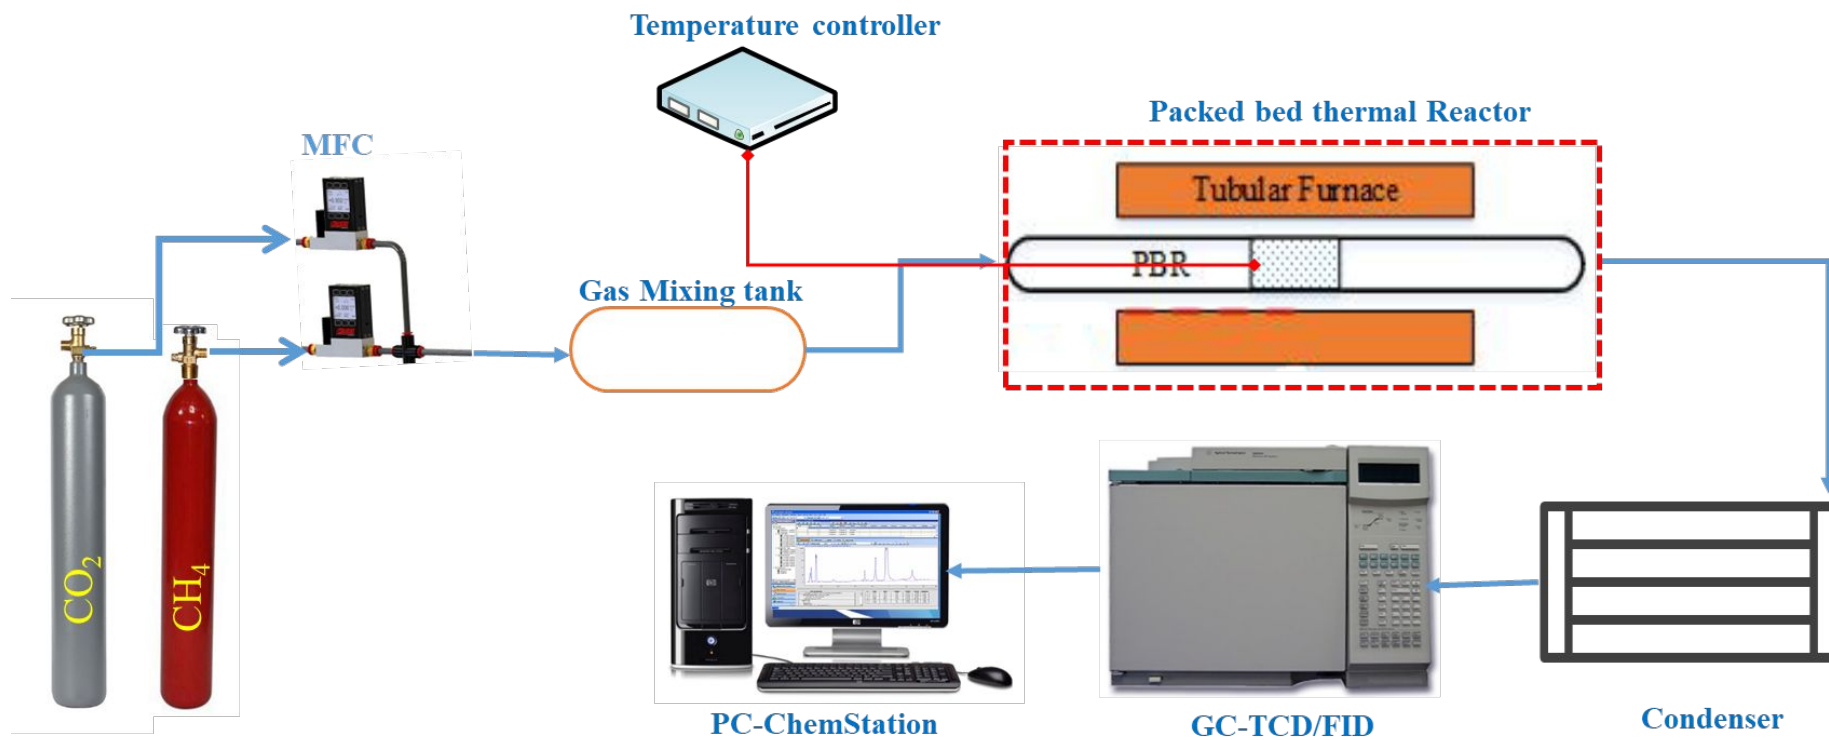

**Figure S2:** Experimental setup for thermal catalytic dry reforming of methane
